# Supplementary material for: Resveratrol displays anti-inflammatory properties in an ex vivo model of immune mediated inflammatory arthritis
Source: PubMed Central journal article supplement (PMC6390607; doi:10.1186/s41927-018-0036-5), 2018-10-10
Supplement: 41927_2018_36_MOESM1_ESM.pdf [file 41927_2018_36_MOESM1_ESM.pdf]

48 hours

SFMC cultures

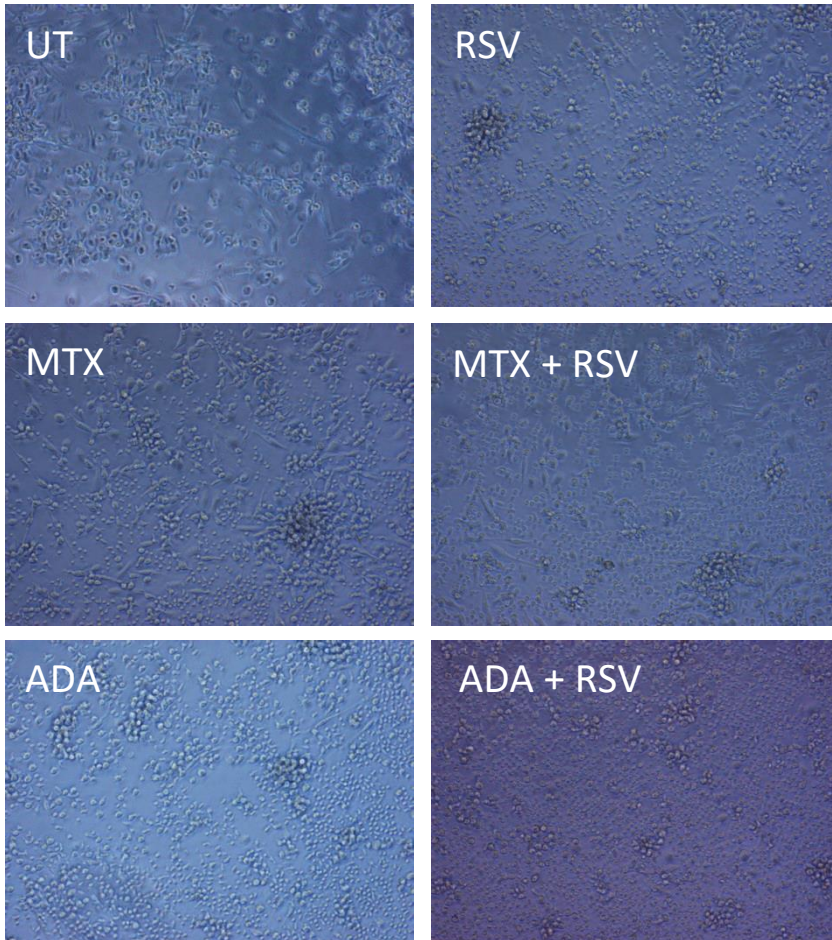

21 days

SFMC cultures

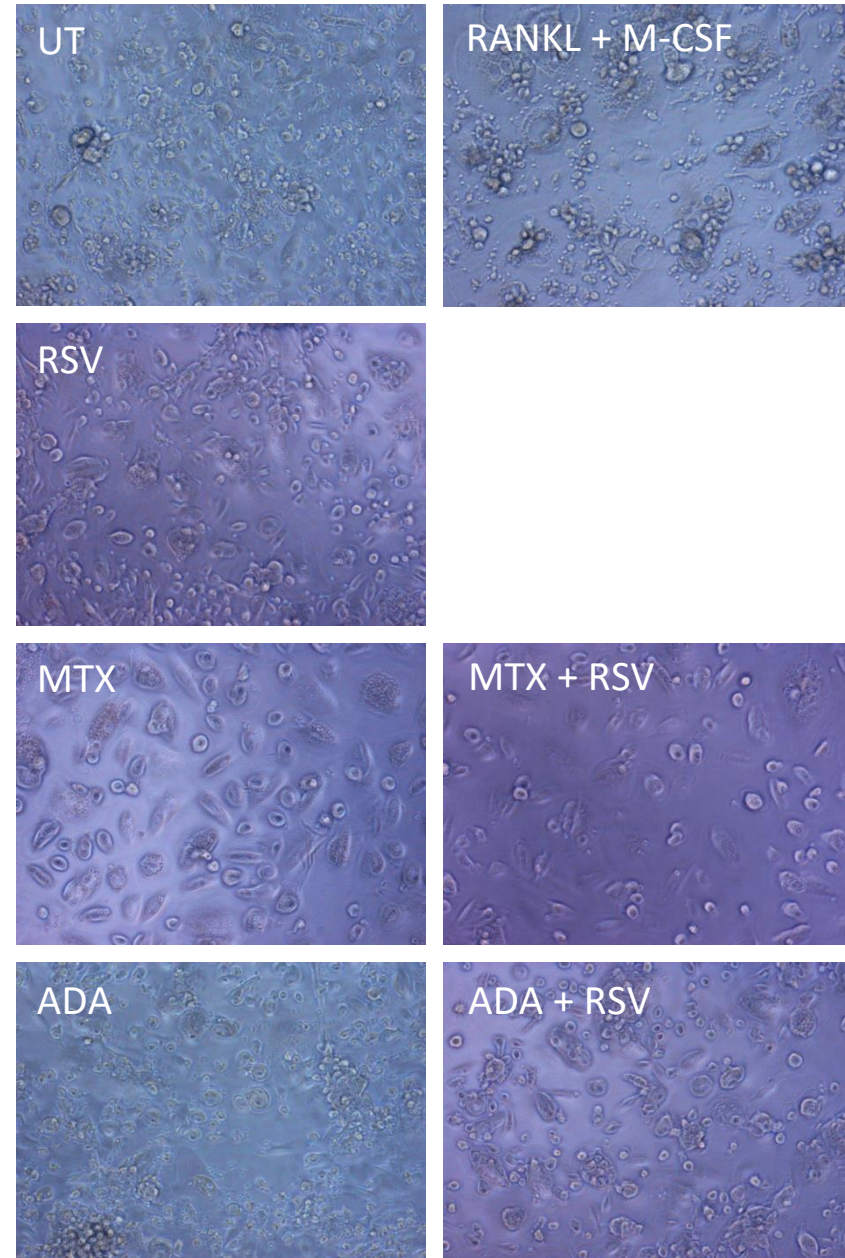

**Additional file 1** Microscope images (x10) of 48 hours and 21 days SFMC after incubation period. No immediate cell loss was detected after treatment. Multinucleated cells were present in 21 days SFMC cultures. UT: untreated (negative control), RANKL + M- SCF: positive control, RSV: resveratrol 25  $\mu$ M, MTX: Ebetrex 5  $\mu$ g/ml, ADA: Adalimumab 5  $\mu$ g/ml.
